# Supplementary material
Source: PubMed Central journal article supplement (PMC2757978)
Supplement: supp_M109.036970_jbc.M109.036970-1.pdf [file supp_M109.036970_jbc.M109.036970-1.pdf]

### **Legend to Supplemental Figure**

**Supplemental Figure 1:** LT enhances IL-1 $\beta$ -induced IKK phosphorylation. Cells were treated with 0.5 ng/ml IL-1 $\beta$  with or without LT. Whole cell lysates were analyzed by western blot for p-IKK $\alpha/\beta$  and IKK $\beta$  levels.

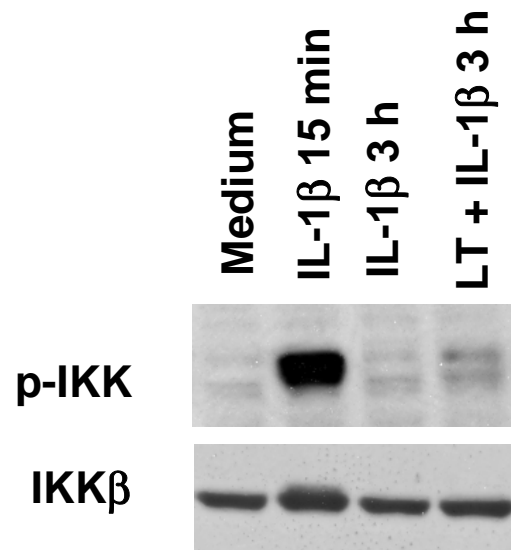

# Supplemental Figure 1
